# Supplementary material for: Genome-Wide Transcriptomic and Proteomic Exploration of Molecular Regulations in Quinoa Responses to Ethylene and Salt Stress
Source: MDPI journal article supplement (doi:10.3390/plants10112281), 2021-10-25
Supplement: s1 [file s1]

>110717159 (*CqGLC*)

ACCTTTGCATGATAATGTAATCAACAATTAAAACTATTAACTTTGTTCTTAA  
GTAAATTCAATCTCAAATGGGGTTAATAAGCAAACCTTCTGCGGTTGCTACT  
TTGCTGCTTCTTGCAACATTTCTACCTAGTCTTCAAGTAACAGAGGCGCAAA  
TTGGTGTATGTTATGGAAGAAATGGGGACAATCTACCATCCCAACAAGAAG  
TGGTTACGATGTACAAAAATAATGGAATAACACGTATGAGACTATATGATCC  
CGACCAAGGATCCCTCCAAGCCCTTAGAAATTCAAACATAGGGCTAATCCT  
TGATGTCCCTACCGACAAAGTCATCTCACTCGCGAATGCTGCAAATGCAAG  
GACATGGGTCCAAAACAATGTAGTCCCTTACGCGTCTAATGTGAATTTTCGT  
TACATTTCAGTAGGTAACGAAATCATGCCTGGTGAGGCCGCGGCAGGATCG  
GTCTTACCTGCCATGCAAAATGTCCAAAATGCCCTTAATGCAGCTAACTTAG  
GTGGTAAAATCAAAGTCTCCACAGCAATCAAGAGTCAGATTGTTTCGGGTT  
TCCCACCTTCTGCCGGTGTTTTTACATCTTCACAATACATGAATCCAATTGTT  
AACTTTCTAAAGAGTAACAATGCTCCTTTATTAGCCAATATCTATCCATACTT  
CTCTTACCTTGGTACTGATTCTATAAACTAGATTACGCGCTCTTTACTTCAC  
CCAACGTCCAAGTTACTGATCCAAATAACGGTTTGAAGTACCAAAACCTAT  
TTGATGCACTAGTGGACACGGTGTATGCTGCATTGGCAAAGGCTGGAGGCC  
CTAACGTACCAATTGTCGTGTCCGAAAGCGGGTGGCCTTCGGCTGGTGGTG  
ATAGACGTGGTGCTGCTACCTTTGGTAACGCAGGACAGTATTACAAGGGTT  
TAATAGGCCATTACAAGCAAGGGACTCCCTTGAAGAAAGGAGCAATTGAG  
ACGTATTTATTTGCTATGTTTGATGAGAACAGAAAGAGTGGTGGTACTGAG  
AATAATTTTGGACTGTTTAGGCCCAATAAGCAGCCCAAATACCAACTCAGTT  
TCAATTGAAATTTAATTACTCGTATATAGTTTTCTGATATACTTCGTTCTGATA  
ATCGTATGATGTTATAATCATCATAATGAATAAGTGAAATAATGTTACACAGG  
CTTTGCCTAAATATGTTATAAGTGTTATATACTTTTACTTGTAATAATGTTATT  
GATATTATGCCCGTCCAAAAAAGTACTCCGTATTATTGAAATATTATGCACT  
A

>110722212 (*CqABCB*)

TTGTCTTTTTTCACAACTCCATACGTTGGCAATGTCTTTGTTCAACTTTACA  
GCAACCCACCAAAATTGGCACTAATTTTACAGTATTATTACTAGTTTAGTTAT  
AGGCCTCCCAAAGTCCCAAAGCCCAATATCAAATCTGCTACttctatttataatctcata  
TTCAACACTAACATCTAACCACCTTGTTTCTTGTTTCATTGATTTTTCAACATTG  
ACAACATTTTGTAAATTTTCTTAAGATTTTTTTTAGGATAAATTTGAGTTGGGTT  
TACAAGAAAAGGCATGAATTTTGGAGGGCATGGTGGTGGTGGTGGTGGTG  
GGTATGGTGGTGGTGGACATGGTTTAGGCGGTGGTGGCGGCGGTAATAGAG  
TTCTCTTTTGGGTGCGCATGCCGGCTTCAAAGAGAGGAAATTTGGCTCAA  
CAGACCTTGAGAATGGTAATGCACCGGCTGCAAATGTGGGATTTCGGTAGGG  
TTCTTTCTCTTGCAAAACCTGATGCACCTAACTTGTATAGCTACAGTTGC  
TCTGTTGATTGCAGCCACATCAAACATATTAGTGCCAAAGTTTGGTGGAAA  
AGTAATTGATATTGTGTCCGGAGATATCAGCTCACCAGAAAAGAAAGCTGA  
AGCTCGGGATGCAGTTACGAGCACCATACTAGAGATTGTCATGGTTGTTATT  
GTAGGTTCAATTTGCACAGCATTGAGGGCGTGGCTATTTAATTCTGCAAGTG  
AAAGGGTTGTTGCAAGACTGAGAAAGAATTTATTCTCCCATCTAATTTGCC

AGGAAATTGCTTTTTTTTGACGTTACTCGAACTGGAGAGCTTTTGAGTAGAC  
TAGCTGAAGACACACAAATCATAAAGAATGCTGCTACTACTAATCTGTCTG  
AAGCTCTGAGAAATTTAGCAACTGCATTCATTGGTCTTGGATTCATGTTTGC  
AACATCATGGAAGTTGACATTGTTGGCATTGGCTGTTGTGCCTCCCATTCT  
GTTGGTGTGCGTAAATTTGGTCGCTTTCTCCGTGAACTCTCACACAAGACT  
CAGGCTGCTGCTGCTGCAGCATCTTCAATTGCAGAGGAATCGTTTGGTGCC  
ATCCGCACAGTAAGGTCCTTTGCCCCAAGAAGATTATGAAATTCAGCGGTATT  
CTGAGAAAGTTGACGAGACTTTAAACTTGGGACTTACACAAGCTAAAGTT  
GCAGGTTTATTCTTTGGAGGACTAAATGCAGCATCCACCCTGTCAGTTATTG  
TTGTGGTGATATATGGAGCTTTCCTGGCTATCAATGGTACTGGCATGACACC  
TGGTGCTCTCACATCCTTCATACTTTATAGCCTTACAGTTGGGTTCATCCATAT  
CTGGACTTTCTGGATTATACACTGTGGCAATGAAAGCTGCGGGAGCCAGTA  
GGCGTGTTTTCCAAGTCTAGACCGAACATCATCCATGCCAGAGCCAGGAT  
CCAAGTGTCATTAGGTGATCAAGATGCAGAAGTGGAATTGGATGATGTCT  
GGTTTGCATATCCTTCACGCCCCAAGTCATATGGTACTAAAGGGAATAACGTT  
AAAAGTCTGCCTAGTTCAAAAGTTGCACTTGTTGGTCCAAGTGGTGGTGG  
AAAAACTACGATAGCACATTTGATTGAAAGATTTTATGATCCTACCAAAGGG  
AAGATTTTGCTGAGTGGGGTTCGCTAGTAGAAATATCTCACAAAGCACTTG  
CATAGCAAGATTAGTATTGTAAGCCAGGAGCCAACTCTCTTCAATTGCTCCA  
TAGAAGAGAACATCGCTTATGGACTAAATGGCAAGGCCAGCACTGCTGATA  
TAGAAAATGCTGCTAAAATGGCAAATGCACATGAATTTATATCCAAGTTTCC  
TGAGAAGTATCAAAGTCAATGTCGGAGAACGTGGGGTTAGATTATCAGGTGG  
TCAGAAACAGCGGATAGCAATTGCCAGAGCTCTGTTGATGAACCCAAAAG  
TACTACTTTTGGATGAAGCAACGAGTGCCCTTGATGCTGAAAGCGAATACT  
TAGTGCAgGATGCCATGGATCGCTTGATGAATGGAAGAACTGTCCTCGTGAT  
AGCACACAGGCTTTCCACTGTGAAAAGTGCAAATGTTGTAGCTGTTATATC  
CGATGGTCAGGTGGTGGAAAGCGGCACTCATGATGAACTTTTGAGCAAGG  
ATGGCATCTACACTGCACTAGTGAGGCGTCAGTTGCAAGGACCCAAAGCC  
GATAGCTAACATTGGAGATATTACTTTACTTACAATTCAGAATACAATTTAG  
AATTTCTATTTGTATTATAGGTCTTCTCTGCCATGTAAGTGAACAAGTGAAGC  
TTAATTTTTTTGGCTTCCGCGTCTCTGTATGTCTTTATTGGGTCTATTAAAGGA  
ATGTAAGGTCACCTACTCACCTTAGTCTTTAATCAAGTATTTTATCTGCATAA  
TCTGTAAACTACTTCTGTTTTGCTTCACTAATATTATCTTAATTTTGATGGGG  
GCAATCCCAATGTC

>110688100 (*CqNRT2.1*)

ACCCTTTTAAATATTATTAAATTAATTAATATCATATGATTACGTAATGTACTCGT  
TGGGATCTTTACTGGCTTTATTATCAACTTTTATAATGTCAACGTTACCTTACT  
ATAAATATTCATGAATACAACAACGTAATACAACAACAAGCCTAATACAAGT  
TTTTCTTCTTGACTAGTGTAACAACATTTAGATTTTTTCAAATCCCTAAAACA  
AAAAACAAAAAACATGGCCGGTGAGCCTGGTAGCTCCATGCATGGAGTC  
ACCGGAAGGGAACAATCGTACGCCTTCTCGGTCTCCCCCTCCACGGTCCCA  
ATAGACCCGACGGCCAAGTTTTCTTTGCCCGTCGATTACAGAGCACAAAGGCC

ACAAGGCTTAAGATATTCTCCTTGGCAAAGCCTCACATGACCACATTCCAC  
CTTAGTTGGATATCATTTTGTGCGTGTTACATATCCACTTTCGCGGCTGCTCC  
CTTGGTTCCTATTATTAGGGACAACCTTGACCTTACTAAGAGGGATATTGGT  
AATGCTTCGGTTGCATCCGTCTCAGGAAGTGTCTTCTCTAGGCTAGTCATGG  
GAACCGTGTGTGACCTCATGGGACCAAGGTACGCTTGTGCGTTCTTAGTCA  
TGTTGACCGCCCCCTACGGTCTTCTGCATGTCGGTTATAGACGATGCAGCTGG  
ATACGTGGCGGTGAGGTTTATGATAGGTTTTTGTCTAGCCACTTTCGTGTGCG  
TGCCAATATTGGATGAGTACCATGTTTAATGGACGGATCATTGGGTTGGTTA  
ATGGAACGGCGGCAGGGTGGGGAAATGTGGGAGGCGGTGCAACCCAACT  
TCTTATGCCTTTGGTTTTTCGAGATCATCCGGCGTGCAGGAGCTACACCATT  
ATAGCATGGAGGATTGCCTTCTTCTACCAGGAATGTTACATATTATTATGGG  
TATTTTGGTGCTAGCACTTGGTCAAGACTTGCCTGATGGTAACCTTGGTGCC  
TTACAAAAAAGGGTGAGGTTGCCAAAGATAAATTCTCTAAGGTACTTTGG  
TATGCAATATCCAACCTACCGTACATGGATCTTTGTGCTCCTCTATGGCTATTC  
TTTGGGTGTGGAGCTAACAACTGATAATGTCATTGCAGAATACTTTTTTGAC  
AGATTCAACCTCAAGTTGCACACAGCAGGAATCATCGCAGCTAGTTTTGGA  
ATGGCTAACTTATTTCCCGCCCCCTTAGGAGGGCTAGCTTCCGACTACAGTG  
CACGTTACTTCGGTATGAGAGGCCGACTTTGGACCCTTTGGACCCTTCCAGA  
CCTTGGGTGGTCTCTTCTGCGTATGGCTAGGCTTAGCCAAGACCCTACCCA  
CTGCCATCGTAGCACTAGTCCTTTTCTCACTAGGGGCTCAAGCCGCGTGTG  
GGGCAACCTATGGGGTCGTCCCCTTCATATCTCGACGATCCCTAGGGATCAT  
CTCGGGCCTCACGGGTGCAGGAGGCAACATTGGATCCGGATTGACTCAATT  
TATATTTTTCACCGCGGGTAGTTTTAGCACTCACCGAGGTCTTACCTACATG  
GGAATCATGACTATTGCGTGCACATTGCCCCGTGACCTTGGTGCATTTTCCGC  
AATGGGGTAGTATGTTCTTACCCCCTACTAAGAATGCTAATGAGGAGGCTTA  
CTATGTTGCTGAGTACGACGACGACGAGAAGAGAAAGGGAATGCATGAAG  
GAAGTGTCAAGTTTGCTGAAAGTGCCCGATCTGAGCGAGGTGGGAAGTCT  
GCTGCGGCTACCCCTACACAACGTCCCAACCCTAACAAATATTTAATAAGTTA  
CTTTCGTATTTTATTTGCTTTTGGCTTAAACAACAATGATATGAGATTATGAT  
GAACTCCTGTAGTAAATTATTGGAGTTTGTTTTATTTTATGTTTGGTTTCTTT  
TTTTTATATATATCATATATACTTTTGGATTTTGGCTCAAGAGTTATGGAGAT  
AACCTTGTAGCAAGTGAATTTTGTCTTGAATAACTTACATACATGTATACTAT  
TACTTCTGTATCTTCAACAGTTCTTGCCAACCTTAAATTTAATTTAGAGGTCTT  
TCCTAGCCTTATAATGGCTAAGGTATGTGCCTCTTTAATCTTGTTTTTTTTGT  
CAA

>110711362 (*CqAOBG*)

ATTACAAATAACGGGTCCAAGTCAGGTTGATATGTACACGCACTAAAGTTT  
GTAAAGAAAAAAAACACATGGAAGAAAATGGAAGCAAAAAAAGCAATCT  
AACAGCGTACTTTATCCCGTACTTGACACCGAGTCACTACTTACCTCTCTTC  
CAAATTGCTAAGTTGTTTGCATCCCGCGGGGTGCACGTAACATTCCTTACCA  
CTTATCACAACTCCCTCTCTTTTCGCGATTCAATCGATTCCCTCAACAACT  
CGGCCTTGACATCGACCTCGACTATGTTCACTTCCCTAGCAAGGAAGTCGG  
CTTGCCCGAGGGGGTTGAGAACTTCAGTGCCTCTCCTAACTTGGAATTCG

CGGTAAAATCTTCCGAGCTTTTTTTCATGCTTCAAGCTCCCATCGAAGCTAAG  
GTTTCGGGCTGCTAAGCCTGACTGTATTGTCGCTGATATGCACTGTTTTTGG  
CCACTGAACTCGCTGCCAACCTTGGTATCCCTCGTTTGATTTACCATGTTTCG  
AGCTGCTTTTGCCCTCTCAGCTGTTGATGCCATTGATAGGTATACTCCTTATG  
AGGATGTGAAATCTGACGACGAAACCTTCCTACTACCGGGACTCCACATC  
CAATATACATGACCCGCTCAGAACTTCCGCAATGGATCCAAACTCCGAGTC  
CCTACACCACATTTTCCAACAAAGTTAAAGAGGCTGATCGCAACTGTTATG  
GTGTTCTTGTTGATAGCTTCTATGAGTTGGAGAAAGACTACATAGATTACTT  
CCGGAACACCTTGGAACGTCGTA CTGTTGGTGTATCGGCCCTCTTTTCCTACAC  
CATGATCTTGTTCTCAAAAACTCAACTCCGGCTTGGAACAACAACAGC  
AAAGCAGAGGAGACCGATAAACACCCTTGTTTGGAATGGCTGGATAAAAT  
GCCACAAGGAAAAGTTGTGTATGTAAGCTTTGGAAGCATATCAAGGTTTAG  
CTCAGCTCAGCTGTTTGAGATTGCTGAGGGACTTGAATCTTCAGGCCAAC  
ATTTATTTGGGTGGTCCGAAAAACGGAGGGGGAGTCCAAGGAAGTGACGG  
ATAAATGGCTACCCGAGGGATTTGAGGAAAGAATTTCTGAGAAAAGTATTG  
GGATGCTTATACAAGGATGGGCACCCCAATTAAAGATATTGGAGCACCCGG  
CCATTGGTGGGTTCGTGACTCACTGTGGGTGGAATCATCGGTAGAGTCCC  
TTTCCGCGGGGCTACCTGTGGTGGCCTGGCCTCTTTCTGCTGAACAGTTCTA  
TCATCGAAAGTTATTTATCGATGTATTAAAGATCGGAGTTGGGGTTGGGAAT  
ATGAAGTGGAGCTCCATGATTGATGGAACGGATGAGTTAGTGAAGAGAGAT  
AAGATTGAGAATGCTGTGAGGGAGTTGATGGGAGATCATGAGGAGGCTCA  
GGAAAGGAGGCAGCGCGCCAAGGAGTTTGGCATCGCCGCTAACAAGGCTG  
TTCAACAAGGTGGTTCTTCTTATGATGACTTAACTGCTGTCATTGATGAACT  
ACAACGTCTCAAGACATCAAATGATGTTGCATGATTCCAACGTCTCAAGAC  
ATCAAGTGTGAAGCAAGTTAAAATTGTGCTCAATTATATGCACAAATTAAAT  
TTAAATAATTATGATTATGGAAATTGTGCTTGTTTTGATTTTAAAGGGCT

>110717430 (*CqCSI*)

ATATTTGGTTCTTAATCGTCAGTTTTATAAATACTAAAATTACTAGCCGAGTA  
AGA ACTCTCATGCCATTTGCAAATGGCGGCAACACACATTTGCAAAGTCCA  
AACCAAAAGAGCCATTTTAAACCGTATTCACATCCTCATACTCCTTTGCC  
ATTCTTGCTCTCTTCTACTACCGTTTTTTCGTCTTTCTCCAACCCTCGTATCTC  
CCTTCTGCCATGGATCTTATTGACCATCGCCGACCTCGTTTTACCTTCGTTT  
GGGCCATGACTCAGGCCTTCCGTTGGCGCCCCGTCTTG CATGACGTGTCTG  
GCTATGAGTCCATCAATCCACGTGACCTTCCAAGGATCGACGTTTTTATATG  
CACCGCCGATCCTACCAAGGAGCCTGTGTTGGAAGTGATGAACTCTGTGAT  
ATCATCCATGGCGCTCGATTATCCGCCTGAAAAGATGGCGATATATTTGTCTG  
GATGATGGAGGTTCTCCTTTGACTAGAGAGGCTATTAAGAAGGCTGTTGAT  
TTTGCTAAGGTTTGGATTCCTTTTTGTAACAAGTATGCTATTAAGACTAGGT  
GTCCAGATGCTTTCTTCTCCGCTTTGGGTGATGATGAAAGACTTCATTGGGA  
TCACGACTTTATCGCTCATGAATCACTGCTAAAGTCGGAATATGAAGCTTTT  
AAGAAATATGTGGAGAAAGAAAGCGGTGATTATAATAAATGCACCGTTGTG  
CATGATCGTGCCCTTGCATCGAGATTATACATGACAGCAAGCAGGATGGA  
GAAGGTGAAGTGAAAATGCCCTTGTGGTTTATGTAGCCAGGGAAAAGAG

ACCAGGTCTTCCTCATCGTTTCAAAGCTGGAGCCCTTAACGCTCTTCTTCG  
AGTATCAGGTTTATTGAGCAATGCGCCTTACTTATTGGTGTGTTGGATTGTGATA  
TGTACTGTCATGATCCAACCTCTGCTCGTCAATCTATGTGCTTCCATCTTGAC  
CCAAACATGGCTCCCTCTCTTGCCTTTGTTCAATACCCGCAAATTTTCTACA  
ACACTAGCAAAAATGATATCTATGATGGCCAAGCCAGATCAGCTCATACGA  
CAAAATGGCAAGGCATGGATGGACTCAGAGGACCGGTCTTGAATGGAAC  
GGGTATTATCTGAAGAAGAAGGCAATATATGGAAGGCCTCATAATGAAGAT  
GAATACCTCATCAATGAACCAGAGAAGGCCTTTGGTTCTTCCACAAAATTC  
ATCGCTTCACTTAAAGAGAACTCCAACCAAGATCTTGTCTTGAAGGAATTC  
ACAAACGATTTGTTACAAGAGGGCTAGAAATTTGGCTACTTGCATTATGAA  
GCAAACACGCTATGGGGTGTGAGGTAGGATTTTTCGTATGATTGCTTGTG  
AGAGTTCATACACTGGATATCTCTTACATTGTAAAGGATGGAAATCTGTGTA  
TCTTTATCCAAAAGAGCGTGCTTCTTGGGATGCACGACAATTGACATGAA  
GGATGCGATTGTTCAATTAATAAAATGGACCTCCGGATTACTTGGAGTTGCC  
ATGTCCAAGTTTAGCCCTCTCACTTATGCTATGTCCAGAATGTCTATTTTGCA  
AAGCATGTGTTATGCGTACATCACATGTTTCAAGTCTTCTTGCAGTTCCGCTC  
TTTATATATGGTGTGTTCTTCCATTCTCCCTACTTAGAGGCGTTTCTGTTTTT  
CCCAAGGTATCGGATCCATGGATACTGGGTTCGTGTTTGTATTTGTATCCTC  
CCATGTTCAACATCTATACGAGGTGCTGTCAAGTGATCATTCAAGTGCAACAA  
TGGTGGAATGAGGTGAGAATCTGGATCATGAAAGCACTATCAGCCTGCTTG  
TTTGGATCAACGGAAGCAATAATGAAGAAGATTGGGATACAGAAAACAAC  
ATTCAGATTAACAAACAAGGTAGTGGAGAAAGAGAAGTTGGATAAATACG  
AGAAGGGAAAGTTCGATTTCTCAGGGGCAGCAATGCTTATGGTTCCTCTCA  
TCATTTTGACAATACTAAATTTGGTGTGCTTCATTGGAGGACTCATAAGGGT  
GATCATCCACAACAACCTATGATGATATGTTTGGCCAACCTTTTCCTGTCCTTTT  
ATCTCCTACTTCTTAGTTACCTACTTTTCGAAGGGATTGTTACAAAAGGTAC  
AGACAAACTTAGGAAGAAAAAATAAGGAGTGATTGAATAACTGCCTAGTA  
CAGTTTTCACTTTACTTCTCAAGATTAGTCCTCGTTTCTGTTTATTTTATTAA  
GATCCGCAACACTTGTAGCCGGCTGCATTCTCAATAATAATGAATTCAATAC  
CATTTGTTTTTTCCCTCTTGCAAGAACAAAGAGTATACAAGTATATACAAAC  
TTTTGATTATCA

>110724764 (*CqPER9*)

AGAGCAGGTAAAACTAGAGCACTAACATTAGTACCCTAAATGGAGCAGAG  
GAACCACTTTGATATAGTCATATAAACAAAGTCATGTATCAAATTAGGAAAT  
CTTGAGTTTAGTGGTTAGTTGTTTCTTCATAAATTTCAACCATTTTTAGTCT  
ATAAATATCAACCAACTTTGTACCCTTAGAATCAACAATTCCAAACCTCAAAA  
ATCTTAGTAGAGTTTGATCAACACTTATGGCTACAAAAATGCACCTAGTGTT  
TTTGGCTTTTCCTTTTATTGATACCGCCTTTTATGGTTGCTCAAGCAGACCCG  
GGTTATAGCTATGGGTACGGCTTTGGATGGGGTAGTGGTGGTGGGAACGAC  
TATAGCTCGTTGTCTCCGTACTTCTATGACTTCTCTTGGCCCTCAAGCTAACA  
ACATTATTGCTTCGGTCTTAGAGAATGCTGTTGCACAAGACCCTCGGATGG  
CTGCTTCTTTGCTTAGGCTTCATTTTCATGACTGCTTTGTTTCAAGGGGTGTGA  
TGCTTCTATACTGCTAGATGATAGCGCGACATTTGTAAGTGAGAAAAAGGCT

AAACCAAATCTTAATTCCTTGAGAGGTTTTACTGTCATTGATGAAATTAAAG  
CCAGGTTAGAAGAAGCATGCCCTGAAACTGTCTCTTGTGCTGATATCTTGG  
CCTTGGTAGCTCGCGCCGCCAGTGTCTTGAGTGGAGGACCTAATTGGGAAG  
TCCCATTAGGAAGAAGGGACTCAAAAGCAGCAAATATGCTACTTGCAAATG  
CAACAATTCCTCCTCCTATTCTTACAGCCCCAAAAGCTTATTGCATCATTTCA  
ACAACAAGGCCTAGATGAAGTTGATCTTGTGCGCTCTCAGGAGCACATAC  
TATTGGGGTGGCGAGGTGTACAAGTTTTAAGCAAAGGTTGTATAGCCAAAA  
TGGTAACAATCAACAACCAGATTTGAGCCTCGAAAAGGCTTACTTAAATGA  
ATTGAAGTCAGTTTGTCTTCATCAGGGGGTGACAACAACATAACTCCATT  
GGATTATGCATCTCCAAAGACCTTTGATAACACTTACTATAAACTCATCTTG  
GGAGGCAGGGGACTTTTGTTTACAGATCAACAACCTTTATTTCAGGAAATTAC  
GCGAATTTAGCTCAATTGGTCAAGTCTTATGCTGAAGATGAAGGGTTGTTCT  
TTGATCAATTTGCTAAGTCCATGGTTAAGATGGGAAAGATTAGCCCTCTCTT  
AGGGTCTAATGGTGAAGTTAGGAAGTATTGTGTCGCGCCCTAATTAATTCATT  
TAAGTACTTTACCTCTTTAAGTAGGATGATTATTGGGTTTAATTTGTGATTAT  
TGGGTTCTTGTC AAGTTGTGAATCCGTACTAAGGTTTGATTATTCATGTTTCG  
ATTTAATTTTAAAAATTGTTGTTAATTTGTAAGGTTGATGTTAGTTGCAATCC  
TTGTAATAATGAAATTCCTTATGCAAATAGTAAGGGTTGATTTAAGGGAGAT  
ATGCATTGTACTGTGTTATAAGATTTATGCAATTGATCAATTATAACTTCTTC

>110735668 (*CqPER12*)

GCTTATAAATTGGCCTTTAAATTTAGCATTTCGATACTACCTAGTGATCAAGAG  
CAACAACAACACTACTAAGTACTATAGTTAAGGCATTAAACTAGGTAACCAAA  
AAACACAAAAAATGGGTTCCCAAATAAATTTGTTGTTCTTAATAATAATGTC  
ATCTTTGGTAGTAGGAAGTTTAAAGTAGTGTACCAGTTGCACCTGGACTATCG  
TACTCATTTTATGGTTCAAAGTGCCCTCAATTAGAATCCATTGTTAGAAATCA  
TCTTAAACAGGTTTTTCAGAAGGATATCACTCAGGCTGCTGGTTTGCTTCGC  
CTTCATTTCCATGATTGCTTTGTT CAGGGATGTGATGGATCAGTATTGTTGGA  
TGGGTCAGCAAGCGGTCCTAGTGAACAAGGCGCACCAACCAACTTGCTCTC  
TAAGGAAAGAGGCCTTTAAAATCATAAATGATATTCGTGCCCTTGTCATAA  
AACATGTGGTCGGATTGTTTCTTGCGCAGATATCACTGCACTTGCAGCTCGT  
GATTCTGTTGTTCTGTCTGGTGGACCAAATTACAACATTCCACTAGGAAGG  
AGGGACAGCCTAAACTTTGCAACAACACAAGTAACACTAGATAATCTACCG  
GCACCTTCTAGCAGCGCCTCAGCCATTCTAAAATCCCTTGGCAACAAAAGG  
TTTGATCCTACTGATGTTGTTGCCCTTTCCGGAGGCCACACCATTGGTTCGCG  
GCCATTGTTCCCTCCTTCACCGACAGGCTCTACCCTACACAAGATAAAACAA  
TGGACCAAACCTTTTGCTAAGAACCTTAAGGCCACTTGCCCGGCCAAAGAC  
ACTGATCGCACCACAAATTTGGACATCCGTACTCCTAATGTATTTCGACAACA  
AATACTACGTAGACCTAATGAATCGCCAAGGCTTATTTACTTCAGATCAAGA  
TTTGTACACTAATCCAATTACAAAGCCGATTGTCACAAGCTTTGCGACAAAT  
CAAAATTTATTTTACGAAAAATTTGTCGTTGCGATGTTGAAAATGGGACAA  
CTTGGTGTGTTGACGGGTACACAAGGTGAAATTCGTGCAAATTGCTCGGCA  
AGAAATGCTAAGAAGGTAGACATGTGGTCTATCATTGACGAGGGTATCACA

ATTTTAAGTGATATGTAATTAAGCTAGCTATATTTTGAGTTGATTGCAATAACTT  
GTGAGGTTTAATTAGATGTTTTGTCGTTAGTTTTTAAGGCTTCATACTTCTAT  
GACAAATAAAATGTTTGACTAGGTAAAATACTCGTACAATTTTATCTAGATC  
AGATCTAGTAGCATGCGTAATAATAGAAGTATTGTACTTGAACTTGATCTTTG  
TCTCTTTTATCAAATTGTCACCTAATTTTAATTAA

>110712995 (*CqACOI*)

TTATCTCTAGGACTAATAAGATAACTAAAGAGAGAAAATGGAGATACCAAC  
CATAAACTTTGGTCAGCTTGAAGGTGAGAAAAGAGGTGAAACAATGGCAC  
TTTTACATCATGCCTGTGAAAAATGGGGATTTTTCCAAATAGAAAATCATGG  
CATAGACAAGGAGTTGATGGAAAAAGTGAAGCAATTCATCAATATATATTAT  
GAAGAAAAATTGAAAGATGGCTTCTTCAAGTCAGATATTAGCAAGGCTTTG  
GAGAACAAGGAGAATGCTTCTAACAGAGATTGGGAAAGCAGCTTCTTCAT  
TTGGCATCGCCCCGAGTCTAACATAAATAAATTTGCTGATTTCTCTGAAGAT  
TTCCGGAAAACGATGGAGATTTACGTCAATCAGCTAGTTAAGGTTGCTGAA  
AACTATCCGAGCTAATGTGTGAAAATCTTGGACTAGAAAAAGACCACATA  
AAGAAAACATTCTCAGGAATCAAAGGCCCTGCAGTAGGAACAAAAGTGGC  
TAAATACCCTGAATGTCCGAACCCTGAACTTGTCAGAGGCCTCCGCGAGCA  
CACTGATGCAGGCGGAATCATTCTGTTACTGCAAGATGATCAAGTTCCAGG  
CCTCGAGTTTTTCAAAGATGGTAAATGGTTTAAGATACCGCCTTCTAAGAAC  
AACACGATCTTTATCAATACAGGGGATCAGATCGAAGTGCTTAGCAATGGA  
AGGTATCAGAGCATTCTGCATCGCGTTATGACAGGAAAATGTGGAAGCAGA  
TTGTCTGTTGCTACGTTTTACAATCCTTTTGGGCTTTCTGACTTTGTTCCTGG  
ACGGGTAGTGACTGATGCGGCTAATCGGAAGCGGGTGAAGTATGATTCTAG  
TTGTCGAGCAATAGGATATGGCTTCCTTCCTTTCTCTTTCTCTTCTTGGGG  
AGTTAGAAAAGGAGTCCAATGAATTTGTGACCACTTTTCGCATATTCCGAA  
AATTACAAGCTACTTATATTAACAAATAA

>110699138 (*CqCPA*)

AAAAATGTATGTACTAAAATTATAAACAAATTTTTTATATTGTATTTATTGCAA  
CTTTGCTCCATTTTCTAAATTTTATTTTGAAGTCCTATGGACGGAGAGCGTG  
ACATATTCTTCCGTAATTGTGCTTTCAAAGTCTCAAAGATGCACAAAATTC  
ACTATATATATATAACATCCAACTTCATACTTTCAATACATAAACTTTTCCA  
ACATAGTCTTTTCGCAATCAACTTAAACAACAATAATAATGTAAACAT  
AACAGCCATCAAACTGCCTCTGATGGCATTTTACAAGGTGATAATGCCCTT  
CAAACCGCCTTCCCCTTACTCATTATACAACTACCTTGATCCTCGTCGTAA  
CCCGCCTCCTCGCTTTTCGCCTTCAAGCCTCTCCGACAACCCAAAGTCATTG  
CTGAAATTGTGGGAGGTATATTGCTGGGACCATCCGCATTTGGCAGGAACC  
AACAATACATGGATAAAATCTTTCCAAAATGGAGCACACCAATTTTAGAATC  
AGTTGCTAGCATTGGTCTTCTTTTCTTCTTATTCTTAGTAGGCCTTGAGTTGG  
ACCTAGGCTCTATTTCGTCGTAGTGGCCGTGAGGCCTTCACCATTGCTCTAGC  
CGGAATAAGTCTCCCCTTTATCGGTGGTGCGGCGGTAGCTGTTATACTCCGC  
CGCACCATCGAGGGAGCTGACCGAGCTGGTTACGGTCCTTTTCTTGTGTTT  
ATGGGAGTTTCACTCTCTATCACCGCCTTCCCGGTTTTAGCCCGTATTTTGG

CTGAACTCAAACCTCTTGACCACCAAAGTAGGGGAGACAGCCATGGCAGCG  
GCCGCTTTTAATGATGTAGCTGCATGGATCCTCCTTGCTCTCGCAGTTGCTC  
TTGCAGGCAACGGCGAGGCAGGTGGTCATAAAAGCAGCCCGTTAGTCTCG  
TTGTGGGTGTTACTAGCCGGGGTTGGGTTCGTAGCATTTCATGTTCTTGGCTG  
TTAAGCCCTTAATGGCCTGGATGGTCCGACGTTGCTCAGCAGAGCAGGGTG  
TGGTGGACGAGCTTTATATCACTATAACCCTAGCCGGTGTACTCGTGGCCGG  
GTTTCATGACCGACTTTATAGGCATTCCTCATATTTGGAGCATTCAATTTTCG  
GTTTGATTATCCCTAAAGAAGGTGATTTTGCCGAGAAGCTACTAGAAAGAA  
TTGAGGATTTTGTTTCAGGCCTATTGTTGCCACTGTACTTTGCCTCTAGCGG  
TCTAAAGACCGACGTCACAAAGATCCAAGGGGGCCGTCGCGTGGGGTTTAC  
TCGTGCTGGTGATCGCGGTTCGCGTGCTTTGGCAAGATTTTGGTACCTTTGT  
GGTGGCTAAGTTTTGTAAAATGAAGGCTAGGGATGCGTTAGTCCTTGGTGT  
GTTGATGAACACAAAAGGTCTGGTCGAGCTCATTGTCCTCAATATCGGAAA  
AGAAAAAAGGTTCTCAATGATGAGATGTTTGCAATTTTAGTGCTAATGGC  
ACTCTTCACAACCTTTATAACAACACCAATAGTAATGGCAATCTTCAAGCCA  
GACAGTTTTGAAACCCAAAAGAGGAAGCTTCAACCTGATGCATCTGTACAT  
ATGGACTCTAGCACTACACCGGCAACCTCGGCTTTTAAAGAACAGTTCAGA  
GTCTTGGCCTGTGCTCATGGTCCAGGGAACGTATCCGGCCTAATAAACCTCA  
TCGAATCAACCCGAAGCACGGCCTCGAAGAACAATCTTAAACTCTACATTA  
TGCACCTTGTAGAGCTCACTGAACGTTCTTCATCTATTCTCATGGTCCACCG  
CCTTCGTCGTAATGGGTTCCTCGTTTATTGACCCAACTCGACGTCGTAGTCA  
AGTTGAGGTACATGACCGTATAGCTTCGGCTTTTGAGACCTACGCTCAATTA  
GGCAGGGTTATGGTTCGTCTGTGACTACTATATCAGCCCTTTCGACGATGC  
ACGAAGATGTTTCGACACGTGGCAGAGGGAAAGAGGGTGATGATGATCATA  
ATGCCATTTTCATAGGATGTGGAGGAAGGATGAAGAAGGGGAGATGAAATTG  
GTGGAGAATTTAGGGCATGGATGGAGAGGTGTGAACCAAAAGTTGCTAAA  
GAATGCTCCTTGCACGGTTTCGGTATTTCGTGGACCGGGGTTTAGGTGCGGG  
TCGTGTAGCTCAGGATGATGCACAAAGGCAGCTTAGGGTTTGTGTTATATTC  
TTTGGAGGGGCTGATGATCGAGAGGCTTTGGAGCTTGCTAGAATGATGGAC  
CATCCCGAAATTCGGGTACGATTATAAGGTTTGTAGAGAGCCAAGGAAGG  
GATGCTAACAATGTCAAGCTAATGCCTTCCCCTGAAAAGTGTAAGTATAGTA  
ATTACACATTCTCTGTTGCTGCCATGAATCGAACGGAGGAAACGGCACTTG  
ATGAGGCAATGGTGGAAAACCTCCGCAACAAATGGGATGGAACAATGGAA  
TTCATACAAAAACAAGCTAACAACATAGAGGAAGCAGTGTTGACACTTGG  
TCGAAGTGGTGAGTACGACCTTATAGTCGTAGGCAAAGGTCGTTTCCCTTC  
GACGATGGTGGCCGAAGTACGCTGACCGCCAAGCCGAGCATGCCGAGCTAG  
GGCCTATAGGGGACATCTTATCATCAACTAACAATGGCATTGTGTCTATCTGT  
GTTGGTTATTCAACAACATGCTTCGGCACATGTAGAAGAGATGCCTGTTGAT  
AAAGTAGTTGAAGGTGATGTTAATGTCCAAGATGCTGCTAACCAAGTTTGA  
TAATCTTTTGGCACAAAGTCTACAACATGGTAAATAGATTTTGTAAATACGTTT  
AGTGTTGTACTGTGCACTGTACAAAATTTGTGTCTCATTTCTTGACTTTAA  
ATATATAATTATAATATGAAATATACGGAGTACCATAATCTCTCA

>110734631 (*CqPK*)



ATGGGTTTGGGACGCTTTACATACATACTTCTTTTAGTTTTTACTTTTTCAAT  
ACTAATTTTCGATTTTTTCGTGGTCGCTAATTCTAACCAGCCTTCCTTGCAGC  
AATCGAAGCCATTGTGCCATGACCAAGAGAAGATTGCATTGCTTCATTTTAA  
GCAAAGCTTTCTTCTTGATTGCTCCACGTCATCATTTTCTGATTTTCGCATATC  
CAAAGGTGAAATCATGGCATGATGAATTAGATATTCATCATCCGGAAAATGC  
CACTGTAAGTGGTGATTGCTGTAGGTGGGATGGTGTCAAGTGCAATGAGGA  
GACGGGTCACGTGATTAGCCTTAACCTTAGTAGCAGTTGCCTTTACGGCAC  
CTTCCCCCGTAACAGCACACTCTTCAGCCTTAATCATCTCCGTGAGCTTGAT  
CTTTCTTTTAATAACTTCAATTATTCTCAAATCCCCTCTGACATTGGTCATCTA  
TACAAGCTCACACACCTCAACCTCTCCTATTAGTTTTAAGTGGTCAAATTC  
CACCAGAAATTTCAAACTGTCAAGCCTATCTCTTCTTGATCTTTCCTTTAA  
TGGAGATCGGCCTACACGTGTTAATGAGAAGTTAAATCTGAACTTAATGA  
TTTGAGTCTAGAGAAGTTGGTCTATAATTTAAGTCGTTTAACTCATCTTCATC  
TAGACTTAGTTGACGTATCGTCTGAGGTACCCCTTAGCTTAAGCAACCGAA  
CTTCCCTAAAAGCTATCTCCCTCCCTTTCTGCAATCTATTGGGTGAATTGCC  
ACAAAGTATTTTCTGGCTACCAAACTTGAAGAAATTTGGTTGGGTTTCAA  
TTCTAAATTAGGAGGATATCTTCCTGATTTTCATTCTAATAGTCCTCTTCGTG  
CTTTAAGTCTATGGGAAACAAAATTTTCAGGGGAATTGCCAGATTCACTTG  
GAAATCTGGTTTTCTTGAATATTATGATTCTGGAAGATTGTGAATTCTCTGG  
AAAAATTCCATCCTCAATAGGTAATTTGACAGACCTTACCATACTCGGCCTT  
GCTGGCAATTATTTTAGTGAGCTCCCTCACTCTATCATGAACCTAACACGTC  
TACTTCTTTATCCCTTTCAAACATGATGAATGTTGAGACTGCTGGAATATTG  
AATTCTTGGTTGCTTAAGCTAAATTTTATCACTCATCTATACCTTCCCCATATG  
AATTTAGGAAATGAATTTTTCTTACTCTGTCTAACTTTACCAGACTCTATGA  
TTTGGAGCTTAGCAACAACCTTGTTAACAGGCCCACTTCCAAGTTGGCTCAT  
GAATCTAACCCAATTAGAATCCTTAGACCTATATATATGGTAA

>110725220 (*CqFK*)

ACAAATAGTAAAAGTATTCTTCTTTAATTAAAAGAAAGAAACAACCCTTAA  
ACGTCGTACGAGTATGACTTGTATGAGTGAATGATTCCGAATAACAGATATA  
AATTAAGATCAGGGTCGTATACAATTCACAAAAATATTGGTATAAGTTTTCT  
GTAAAAAAGTGCAGGCCTCTGTTCTTTGTGTCGTCAT  
TTCCTTCACTGGAAAAATGAGAATGAAAAGAAAATCCCTAATTGAGGAAA  
GGTATTACGGGATCAAAAAGAGGCAGATGAGTTTTATAAAGATGGTACAAG  
AAAGAGCTGTAAATGAAAACCTTCTTGGGTGCCTTTTTTACCTAATGATTT  
GATGTTTAAGGTCTTTCTTTTATTACCAATCAAATCTCTTTTGAGGTTTACTT  
GTGTTTGCAAGGCATGGTATAAGTTGATCCATTGTGCTGAGTTTGTTGAGGC  
TTACAATAATCATGCTGAGACCACCCCTATCATACTCCGGGGAGTTGATAAC  
AAAAGACCGTTCACATTCCATGTCGAAACCCAACTCAGCCAAGCTGAAAG  
CTTTTGTTTGTTTCCCTTGAGCTCGGGGACTAAACAAAGCAAGTCCATCCAT  
TTCTTGGAATTGACAATGAGAAGGGCAAGTTAATTGACCTCAATATTAGCT  
GTTCCGGATCACTTGTATCCACTTGCAATGGGTGATTTTGATCACCTCTATG  
CAAGGACTTATGAAGGAAAGAAATTCCTTTTTGGATCAGCCTTTGGTTGGC  
AGTCAAGAAAAACCAGGGCGGTTAATTGTGATGAATCCTATGACGAGAAA

ATTGATAGGGTTTCCTCCAGGAACTCTTCCGAGTAAACTTCATGAGGAATC  
GTATGGGCTAGTTTATAGCCATTTAGAAGGTGTTTTTAAAGTGGTGCATTTG  
TTCAAGGATAAATCAGGGTGTATTGCTTGTGAGATTTTAAGCTTGCAGACA  
AGATCATGGAAAGCGGTTAATGGGCCAGTTGGAACGCTTTTTAATAAATTA  
GGCCAGGCACCTATTTAGCTCTTGGAGCTTTGCACTGGCTTCCTGGTCCAT  
CTAATTCCAATTATATAATCTCTATGGGGGCTGATGATGAAAAATTCTCCGTG  
ACAGACCTTCCAATGACCATGGGAATGTATGATAGGCTAGTCGAAATGGGT  
GGTTTTCTGAGCTTTGTGAACAGTTTGGATATGGACCATATAGATGTGTGGG  
TCTTGAAGGGGTAGAAAGGAACGAAGTGGGTAAAGCAGCACACCATTTGC  
ATCGATGCTCTTTTGGGTATGTGGATAATGAGGAGTACTCTTTACCTTCTTT  
TGGTTTGAATGCCAAAGAAATGGTATTTAGGAGAAAAAAGAGATTGTATTC  
TTACGACTTTGAGCTTGAAGAAATCAGAGAGATTGAAATGGACCATGAAA  
GTATCACAGCATATGAGAATATTATACCCCACTCGAATAACCTTGCTACATGG  
GAATCTCTTGAACCAATGAGTTAATCCTGAAGATTTTTTGCACCATGCCTTG  
AAGTTCTTGAAGGCCTGAAGCTGCTCGAGAACATCTGAACATGCGTTAAGC  
AAACCGTGTTTATTATGTTCCCTTCCACTCACATATATATTCATAATCTATTTG  
AACTTTGGATCAGCTCGATGACTTGATTTTATGGTCGTGGTTTGATTATAG  
GTATGCTGCCATATGCAGTCCACATATATACACTCTTGTATATTTGGAAGTTG  
TTGCACTAAGAGATTGAAGTATTTATGCAGATATAGAGCTTGTTCCAGTGAT  
CTAAAATTGTGTTTAAAGGCGCATCTTTTACCTTCTATTTTGCGGGTTTGTGCT  
AACACGATCTTTGCTGTTTGTACTTCCTCCGTTTTTTTAGTTGATACCATTG  
ACTTTTACACTATTCA

>110735797 (*CqPDP*)

CTAACTTATTCAACTCAAACATAAATAATTAAAAAAGT  
TCCCAAGTCATCTTCTCCTATCCTCCTTCCCACTAAATCTTAGAAG  
AAAAAAATGGGTCTCTTCTCCTGAGACCAATGGTAATGCAGTCGTGGGGA  
GGACAACCGTGCATCGTTTGATCGCGGAGGAAGGATCGGTGTTGATGCCG  
GGTATCCAAGACGCTTTCTCTGCCGCCATTTGTGCCAAAACCGGCTTCAA  
GCTTGCTTTGTCTCCGGTTTTGGTGTTCGCTGCCCTCCTCGGCTTGCTG  
ACTTTGGCTTGCTTACGACCGCAGAAGTTGTAGGAGTTGTCCGTAGAATGA  
CTGCTGCTGCTCCAAGTTTGTGTGTCGTTGTTGATGGAgACACCGGAGGTG  
GTGGCCCTCTCAATGTGCAAAGATTCATCAAAGACTTGATTGCAGCCGGTG  
CTAAGGGTGTTTTCTAGAGgATCAAGTATGGCCAAAAAAGTGTGgTCATAT  
GCGTGGTAAGAGTGTTGTACCTGCAGAAGAGCATGCACTTAAAATTGCAGC  
AGCAAGAGAAGCTATTGGTGAATCTGATTTCTTCTTGGTAGCAAGAACTGA  
TGCTAGAGCACCACACGGTCTTCAAGAAGCAATTAGACGTGCCAACCTTTA  
CAGAGAGGCCGGAGCTGATGCAACCTTCGTTGAGGCACCTGCAAACATCG  
ATGAGCTTAACGAGGTTGTCAAGGGTACAAAAGGTTTGAGAATCGCTAACA  
TGATTGAAGGTGGAAAGACCCCATACATACACCAGCAGAGTTCAAGGAG  
ATGGGATTCCACTTGATTGCTCATTCACTATCAACAATCTATGCTACAACCA  
AAGCTTTGGTTGGAATCATGAAGGTTCTTAAGGAAAAGGGTACCACTAGGG  
ATGACTTGGAACAAGATGGTTACTTTCTCTGAATTTAATGACATGATTAGCTT  
GGAATCATGGTATGAAATGGAATCAAAGTTCAAGAACTTCACCCCAAATC

TTTGGAATCCTAAGACTTTTTACCTATCTTGGCATGTTTAGCTCGACATATAC  
AAGAGTTGAAATTAAGACATGCATGTTTGTGCAATTGAGTTTTGTAAGATT  
ATGAAATTAGTTTAATATTTGTTTGAGAAAATAATAATTTTGCATATTGAGTA  
ATGTTGTAAGTTTATTTAAAACCTGTTTTGAGAGCCTGCAAGGTGTAGATGC  
TTGTAATCTCATCAATATTAGTAATCAAATATAATTCTGAAGCTATTTTTTCTA

>110724665 (CqACTIN)

AAGGATAGCAAGTCACTCATTCAATCGCCTCTCTCTCAAAATTCTCGCTTTC  
TCTCTCTAAATTCTCTCTCTAATCTCTTTCACTTTCTCTCTACTTTCTCTCT  
CCTCTCGCAGCCGCAAGCTCGCTTCGTTCTTCAAGTATATAAATCGAGATGG  
CTGATGCAGAGGAGATCCAACCCCTTGTCTGTGACAATGGAAGTGGTATGG  
TCAAGGCTGGATTTGCCGGTGATGATGCTCCAAGGGCCGTCTTCCCAAGTA  
TTGTTGGTCGTCCCAGACACACTGGTGTGTCATGGTTGGTATGGGACAGAAGG  
ATGCATATGTTGGAGATGAAGCTCAGTCCAAGAGAGGAATTTTGACCTTGA  
AGTACCCAATTGAGCACGGTATTGTGAGCAACTGGGATGATATGGAGAAGA  
TTTGGCATCACACCTTCTACAATGAGCTTCGTGTTGCCCCAGAAGAACACC  
CAGTGTGTGCTTACTGAGGCACCATTTGAACCCTAAGGCTAACAGAGAGAAG  
ATGACCCAGATCATGTTTGAGACCTTCAATGTGCCCGCTATGTATGTTGCCA  
TCCAGGCCGTTCTATCTCTGTACGCTAGTGGTCGTACCACAGGTATCGTGCT  
TGAATCCGGTGATGGTGTGAGTCACACAGTTCCCATTTACGAGGGTTATGC  
CCTCCCCCATGCCATCCTCCGTTTGGATCTTGCCGGACGTGATCTTACCGAT  
TATCTCATGAAGATCCTTACCGAGAGAGGTTACATGTTTACAACATCAGCTG  
AACGGGAAATTGTCCGTGATATTAAGGAGAAGCTTGCATACGTTGCTCTTG  
ACTTTGAGCAGGAATCAGAGACTGCCAAGAGCAGCTCTGCCATTGAAAAG  
AACTACGAGCTTCCTGATGGTCAGGTCATTACCATTGGAGCTGAGAGATTC  
CGTTGCCCAGAGGTCCTCTTCCAGCCATCATTGATCGGTATGGAAGCTGCA  
GGTATCCACGAGACTACCTACAACCTCCATCATGAAGTGTGATGTTGATATCA  
GGAAGGACCTATACGGTAACATTGTGCTCAGTGGTGGTACAACCTATGTTCC  
CTGGCATTGCTGACCGTATGAGCAAAGAAATCACAGCTCTTGCTCCCAGCA  
GCATGAAGATCAAGGTTGTTGCACCTCCTGAGAGGAAGTACAGTGTCTGGA  
TAGGAGGGTCTATCCTTGCGTCTCTCAGCACCTTCCAACAGATGTGGATCTC  
CAAGGGAGAATACGATGAATCCGGCCCATCAATTGTTTACCGAAAGTGCTT  
CTAAGAAGATAAGTTTTGAGATTGTAGTCCTACATAGTCTCCTGTTGTCTCT  
TTGTTTTTCTTTCTGTTTGGTCAAAAAAAGAAAAAAAACGTATTAGTGTG  
GTGTATGATTTGATTTGATTTGGTCGAGAGAGATGGAGAGGGTTTAGGAGC  
TTGGAATTTCTATTGTTTGTGTAACATTTTTTCGAGAATTATGGTATGTAATC  
TTTGCGGATTGCAGAATGTTTAATTTCTATACTCTACTATTTTTCTGGGTCA
