# Supplementary material for: Genome-Wide Transcriptomic and Proteomic Exploration of Molecular Regulations in Quinoa Responses to Ethylene and Salt Stress
Source: MDPI journal article supplement (doi:10.3390/plants10112281), 2021-10-25
Supplement: s1 [file s1]

Supplementary material 2: Oligonucleotide primers used in qRT-PCR confirmation.

| Gene ID   | Annotation      | Description                                 | Primer Name | Primer Sequence (5'→3') |
|-----------|-----------------|---------------------------------------------|-------------|-------------------------|
| 110717159 | <i>CqGLC</i>    | glucan endo-1,3-beta-glucosidase            | CqGLC-Fq    | AATCATGCCTGGTGAGGCCG    |
| 110717159 | <i>CqGLC</i>    | glucan endo-1,3-beta-glucosidase            | CqGLC-Rq    | AAACACCGGCAGAAGGTGGG    |
| 110722212 | <i>CqABCB</i>   | ABC transporter B family member 25          | CqABCB-Fq   | TTTGGTGCCATCCGCACAGT    |
| 110722212 | <i>CqABCB</i>   | ABC transporter B family member 25          | CqABCB-Rq   | GCACCAGGTGTCATGCCAGT    |
| 110688100 | <i>CqNRT2.1</i> | high-affinity nitrate transporter 2.1       | CqNRT2.1-Fq | TGCACATTGCCCGTGACCTT    |
| 110688100 | <i>CqNRT2.1</i> | high-affinity nitrate transporter 2.1       | CqNRT2.1-Rq | GCAGACTTCCCACCTCGCTC    |
| 110711362 | <i>CqAOBG</i>   | anthocyanin 3'-O-beta-glucosyltransferase   | CqAOBG-Fq   | GACCACTGAACTCGCTGCCA    |
| 110711362 | <i>CqAOBG</i>   | anthocyanin 3'-O-beta-glucosyltransferase   | CqAOBG-Rq   | TTGGATGTGGGAGTCCCGGT    |
| 110717430 | <i>CqCSI</i>    | cellulose synthase-like protein G2          | CqCSI-Fq    | TGGCGGCAACACACATTTGC    |
| 110717430 | <i>CqCSI</i>    | cellulose synthase-like protein G2          | CqCSI-Rq    | AAACGAGGTCGGCGATGGTC    |
| 110724764 | <i>CqPER9</i>   | peroxidase 9-like                           | CqPER9-Fq   | GGGTACGGCTTTGGATGGGG    |
| 110724764 | <i>CqPER9</i>   | peroxidase 9-like                           | CqPER9-Rq   | GAAGCAGCCATCCGAGGGTC    |
| 110735668 | <i>CqPER12</i>  | peroxidase 12-like                          | CqPER12-Fq  | TTGGATGGGTCAGCAAGCGG    |
| 110735668 | <i>CqPER12</i>  | peroxidase 12-like                          | CqPER12-Rq  | GAATGGCTGAGGCGCTGCTA    |
| 110712995 | <i>CqACO1</i>   | 1-aminocyclopropane-1-carboxylate oxidase 1 | CqACO1-Fq   | GGCATCGCCCCGAGTCTAAC    |
| 110712995 | <i>CqACO1</i>   | 1-aminocyclopropane-1-carboxylate oxidase 1 | CqACO1-Rq   | GCGGAGGCCTCTGACAAGTT    |
| 110699138 | <i>CqCPA</i>    | cation/H <sup>+</sup> antiporter 20-like    | CqCPA-Fq    | GCACCATCGAGGGAGCTGAC    |
| 110699138 | <i>CqCPA</i>    | cation/H <sup>+</sup> antiporter 20-like    | CqCPA-Rq    | TACGAACCCAACCCCGGCTA    |
| 110734631 | <i>CqPK</i>     | serine/threonine-protein kinase             | CqPK-Fq     | TCCTTGCAGCAATCGAAGCCA   |
| 110734631 | <i>CqPK</i>     | serine/threonine-protein kinase             | CqPK-Rq     | TACGGGGGAAGGTGCCGTAA    |
| 110725220 | <i>CqFK</i>     | F-box/kelch-repeat protein At3g23880-like   | CqFK-Fq     | TGGATCAGCCTTTGGTTGGCA   |
| 110725220 | <i>CqFK</i>     | F-box/kelch-repeat protein At3g23880-like   | CqFK-Rq     | AAGCGTTCCAACCTGGCCCAT   |
| 110735797 | <i>CqPDP</i>    | petal death protein-like                    | CqPDP-Fq    | TTGGCTTGCTTACGACCGCA    |

|           |                |                          |            |                      |
|-----------|----------------|--------------------------|------------|----------------------|
| 110735797 | <i>CqPDP</i>   | petal death protein-like | CqPDP-Rq   | AGCACCGGCTGCAATCAAGT |
| 110724665 | <i>CqACTIN</i> | actin                    | CqACTIN-Fq | TGAGCTTCGTGTTGCCCCAG |
| 110724665 | <i>CqACTIN</i> | actin                    | CqACTIN-Rq | GGCATGGGGGAGGGCATAAC |
